# Supplementary material for: Use of COVID-19 Convalescent Plasma for Treatment of Symptomatic SARS-CoV-2 Infection at a Children’s Hospital: A Contribution to a Still Inadequate Body of Evidence
Source: MDPI journal article supplement (doi:10.3390/children10020350), 2023-02-10
Supplement: s1 [file s1]

**Supplementary Table S1. Definitions of TRALI, TACO, allergic reactions and ADE.**

**Transfusion Associated Lung Injury (TRALI)<sup>1-3</sup>**

NO evidence of worsening acute lung injury prior to transfusion

AND *Worsening* ALI onset during or within 6 hours of cessation of transfusion

AND *Worsening* hypoxemia (change in oxygen delivery/ventilatory support)

AND *Radiographic* evidence of bilateral infiltrates

AND no evidence of *worsening* left atrial hypertension

**Transfusion Associated Circulatory Overload (TACO)<sup>1, 2, 4</sup>**

New onset or exacerbation of 3 or more of the following within 12 hours of cessation of transfusion:

Evidence of acute worsening respiratory distress (dyspnea, tachypnea, cyanosis and decreased oxygen saturation values in the absence of other specific causes)

AND/OR radiographic or clinical evidence of acute or worsening pulmonary edema

AND elevated brain natriuretic peptide (BNP) or NT-pro BNP relevant biomarker

AND/OR other unexplained cardiovascular changes such as elevated central venous pressure

**Allergic Reaction<sup>2</sup>**

2 or more of the following occurring during or within 4 hours of cessation of transfusion (non-severe allergic reactions do not need to be reported):

Conjunctival edema

Edema of lips, tongue, and uvula

Erythema and edema of the periorbital area

Localized angioedema

Maculopapular rash

Pruritus (itching)

Urticaria (hives)

### **Antibody-Dependent Enhancement of Disease (ADE)<sup>5</sup>**

Enhancement of disease severity in an infected person when an antibody against a pathogen—whether acquired by an earlier infection, vaccination or passive transfer—worsens its virulence by a mechanism that is shown to be antibody-dependent.

### **References:**

1. Semple JW RJ, Kapur R. Transfusion-associated circulatory overload and transfusion-related acute lung injury. *Blood*. 2019(Apr 25;133(17):1840-1853).
2. CDC. National Healthcare Safety Network Biovigilance Component Hemovigilance Module Surveillance Protocol. 2021.
3. Vlaar APJ, Toy P, Fung M, et al. A consensus redefinition of transfusion-related acute lung injury. *Transfusion*. 2019;59(7):2465-76.
4. Wiersum-Osselton JC, Whitaker B, Grey S, et al. Revised international surveillance case definition of transfusion-associated circulatory overload: a classification agreement validation study. *The Lancet Haematology*. 2019;6(7):e350-e8.
5. Arvin AM, Fink K, Schmid MA, et al. A perspective on potential antibody-dependent enhancement of SARS-CoV-2. *Nature*. 2020;584(7821):353-63.
